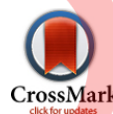

# Development and Evaluation of a Simple and Effective Prediction Approach for Identifying Those at High Risk of Dyslipidemia in Rural Adult Residents

Chong-Jian Wang<sup>1</sup>, Yu-Qian Li<sup>2</sup>, Ling Wang<sup>1</sup>, Lin-Lin Li<sup>1</sup>, Yi-Rui Guo<sup>1</sup>, Ling-Yun Zhang<sup>3</sup>, Mei-Xi Zhang<sup>1</sup>, Rong-Hai Bie<sup>1\*</sup>

**1** Department of Epidemiology and Biostatistics, College of Public Health, Zhengzhou University, Zhengzhou, Henan, People's Republic of China, **2** Department of Clinical Pharmacology, School of Pharmaceutical Science, Zhengzhou University, Zhengzhou, Henan, People's Republic of China, **3** Department of Endocrinology, Military Hospital of Henan Province, Zhengzhou, Henan, People's Republic of China

## Abstract

**Background:** Dyslipidemia is an extremely prevalent but preventable risk factor for cardiovascular disease. However, many dyslipidemia patients remain undetected in resource limited settings. The study was performed to develop and evaluate a simple and effective prediction approach without biochemical parameters to identify those at high risk of dyslipidemia in rural adult population.

**Methods:** Demographic, dietary and lifestyle, and anthropometric data were collected by a cross-sectional survey from 8,914 participants living in rural areas aged 35–78 years. There were 6,686 participants randomly selected into a training group for constructing the artificial neural network (ANN) and logistic regression (LR) prediction models. The remaining 2,228 participants were assigned to a validation group for performance comparisons of ANN and LR models. The predictors of dyslipidemia risk were identified from the training group using multivariate logistic regression analysis. Predictive performance was evaluated by receiver operating characteristic (ROC) curve.

**Results:** Some risk factors were significantly associated with dyslipidemia, including age, gender, educational level, smoking, high-fat diet, vegetable and fruit intake, family history, physical activity, and central obesity. For the ANN model, the sensitivity, specificity, positive and negative likelihood ratio, positive and negative predictive values were 90.41%, 76.66%, 3.87, 0.13, 76.33%, and 90.58%, respectively, while LR model were only 57.37%, 70.91%, 1.97, 0.60, 62.09%, and 66.73%, respectively. The area under the ROC curve (AUC) value of the ANN model was  $0.86 \pm 0.01$ , showing more accurate overall performance than traditional LR model ( $AUC = 0.68 \pm 0.01$ ,  $P < 0.001$ ).

**Conclusion:** The ANN model is a simple and effective prediction approach to identify those at high risk of dyslipidemia, and it can be used to screen undiagnosed dyslipidemia patients in rural adult population. Further work is planned to confirm these results by incorporating multi-center and longer follow-up data.

**Citation:** Wang C-J, Li Y-Q, Wang L, Li L-L, Guo Y-R, et al. (2012) Development and Evaluation of a Simple and Effective Prediction Approach for Identifying Those at High Risk of Dyslipidemia in Rural Adult Residents. PLoS ONE 7(8): e43834. doi:10.1371/journal.pone.0043834

**Editor:** German Malaga, Universidad Peruana Cayetano Heredia, Peru

**Received:** April 25, 2012; **Accepted:** July 30, 2012; **Published:** August 28, 2012

**Copyright:** © 2012 Wang et al. This is an open-access article distributed under the terms of the Creative Commons Attribution License, which permits unrestricted use, distribution, and reproduction in any medium, provided the original author and source are credited.

**Funding:** This research was supported by the National High Technology Research and Development Program of China (Grant No: 2006BAI01A01), China Postdoctoral Science Foundation (Grant No: 201104375), and Medical Scientific Research Foundation of Health Department of Henan Province (Grant No: 201004042). The funders had no role in study design, data collection and analysis, decision to publish, or preparation of the manuscript.

**Competing Interests:** The authors have declared that no competing interests exist.

\* E-mail: bierh2012@gmail.com

## Introduction

Dyslipidemia is a widely recognized risk factor for cardiovascular diseases, a leading cause of death in both developed and developing countries [1,2]. The World Health Organization (WHO) estimates that dyslipidemia is associated with more than half of the global cases of ischemic heart disease and more than four million deaths per year [3]. Evidence demonstrates that dyslipidemia can be prevented and controlled, which is cost-beneficial and with effective prevention programs can decrease the incidence and mortality of cardiovascular diseases [4,5].

Estimating an individual's risk across a range of presumed risk factors is fundamental to prevent dyslipidemia [6]. Due to its

complex and multifactorial nature, the prevention of dyslipidemia must refer to multiple risk factors. Evidence showed that some predictors are associated with the occurrence of dyslipidemia [7]. Factors related to diet, lifestyle and family history might be associated with an increased risk of dyslipidemia [8,9]. However, it is difficult to evaluate an individual's risk of dyslipidemia when many predictors exist concomitantly. A model that integrates related factors and predicts the risk of dyslipidemia would be helpful to promote health education and counseling, and enable further development of computerized medical decision support systems for aiding healthcare practitioners to assess the risks of their patients quickly, inexpensively, and noninvasively [9,10].

Logistic regression (LR) is often used to identify significant factors that correlate with disease, and has commonly been used to develop models for clinical diagnosis and treatment [11]. Artificial neural network (ANN) is a computer modeling technique based on the observed behaviors of biological neurons [12]. This is a non-parametric pattern recognition method that can recognize hidden patterns between independent and dependent variables [13]. Although ANN has been used in oncology, diabetes, hypertension, and other diseases [14–21], none have developed and evaluated the feasibility of the ANN model for predicting the risk of dyslipidemia in rural adults. Thus, it is unclear whether the ANN model is reliable and effective to identify those at high risk of dyslipidemia. Therefore, the purpose of this study was to develop and deliver an ANN model without biochemical parameters to identify those at high risk of dyslipidemia in rural adult population, and evaluate the predictive performance of the ANN model in comparison with the traditional LR model.

## Participants and Methods

### Study Population

This study was a cross-sectional survey, and subjects were selected randomly from eligible candidates in the residential registration record from the rural areas in Henan Province, China. The eligibility of the candidate was defined as those who were stable residents for at least 10 years in the study areas aged 35–78 years, and were free from the following conditions: 1) severe psychological disorders, physical disabilities, cancer, Alzheimer's disease, or dementia, within 6 months; or 2) currently diagnosed with tuberculosis, acquired immune deficiency syndrome (AIDS), and other infectious diseases. Ultimately, a total of 8,914 residents who met the criteria enrolled in the study. Informed consent was obtained from all participants. The procedure of the study was approved by the Zhengzhou University Medical Ethics Committee, and written informed consent was obtained for all participants.

### Data Collection and Measurements

A home interview was conducted by physicians or public health workers from the local Centers for Disease Control and Prevention and the community hospital. All investigators and staff successfully completed a training program that oriented them both to the aims of the study and to the specific tools and methodologies used. At the training sessions, interviewers were given detailed instructions on administration of the study questionnaire.

**Demographic data.** Education level was classified into five categories: no education, primary school, middle school, high school, college and above. Marital status was categorized as unmarried, married/cohabitation, and divorced/widowed. Occupation was categorized as farmers, laborers, professionals and employers/managers. Individual annual income was calculated by total household income divided by the number of family members. Positive family history was defined as the participant's parents or siblings having a history of dyslipidemia at or before the baseline examination.

**Dietary and lifestyle behaviors.** Three-day dietary intake data were collected from each subject using a 24-hour diet recall and a 2-day diet record. The daily intake of energy, nutrients, food and food groups for each subject were calculated using China Food Composition Table [22]. According to the Chinese Dietary Guidelines [23], vegetable and fruit intake was defined as consuming an average of more than 500 g per day, and fat intake is defined as consuming an average of more than 25 g per day.

Current smoking status included smoker and non-smoker. Participants who currently smoked and had smoked at least 100

cigarettes during their lifetime were classified as current smokers if they answered affirmatively to the following questions: “Do you smoke cigarettes now?” and “Have you smoked at least 100 cigarettes during your lifetime?” Physical activity level was classified as low, moderate, or high according to the International Physical Activity Questionnaire (IPAQ) scoring protocol [24].

**Anthropometric data.** Body weight and height were measured twice in light indoor clothing without shoes to the nearest 0.1 kg and 0.1 cm, respectively. Waist circumference (WC) was measured twice at the mid-point between the lowest rib and the iliac crest to the nearest 0.1 cm, after inhalation and exhalation. Central obesity based on WC (Male: WC  $\geq 90$  cm; Female: WC  $\geq 80$  cm) was defined according to WHO criteria for the Asia-Pacific region population [25].

**Laboratory measurement.** An overnight fasting blood specimen was collected in a vacuum tube containing EDTA for measurement of lipid profile. Blood specimens were centrifuged at 4°C and 3,000 rpm for 10 minutes, and the plasma was transferred and stored at –20°C for biochemical analyses. Total cholesterol (TC), triglycerides (TG), high-density lipoprotein cholesterol (HDL-C), and low-density lipoprotein cholesterol (LDL-C) were measured enzymatically on an automatic biochemical analyzer (Hitachi 7080, Tokyo, Japan) with reagents purchased from Wako Pure Chemical Industries (Osaka, Japan).

### Definition of Dyslipidemia

According to the China Adult Dyslipidemia Prevention Guide (2007 Edition) criteria [26], subjects were considered normal if their TC was less than 6.22 mmol/L, TG was less than 2.26 mmol/L, and HDL-C was greater than 1.04 mmol/L at the time of examination. The subjects were considered having dyslipidemia if one of their TC, TG or HDL-C were greater than 6.22 mmol/L, 2.26 mmol/L, or less than 1.04 mmol/L, respectively.

### Training and Validation Data Sets

Of 8,914 participants who met inclusion criteria, 75% of subjects ( $N_1 = 6,686$ ) were randomly selected to provide the training group for constructing ANN and LR prediction models. The remaining 25% of participants ( $N_2 = 2,228$ ) were assigned to the validation group for performance comparisons of ANN and LR models. The proportion of dyslipidemia between the training group and validation group was similar to the surveyed population data, and there was no statistically significant difference by  $\chi^2$  test for gender and age between the training and validation datasets (Table 1).

### Modeling Tools

**Logistic regression.** The LR model generates the coefficients for the following formula used in logit transformation for predicting the probability of an event among patients with certain characteristics of interest:  $\text{Logit}(P) = \beta_0 + \beta_1 \chi_1 + \beta_2 \chi_2 + \dots + \beta_i \chi_i$  [9]. The formula  $P = 1 / (1 + e^{-\text{logit}(P)})$  used for calculating the probability of dyslipidemia in this study, where 1 = dyslipidemia and 0 = non-dyslipidemia. A stepwise algorithm was used to construct the multivariate LR model. At each step, independent variables not yet included in the equation were tested for possible inclusion. The variable with the strongest significant contribution to improving the model was included. Variables already included in the logistic regression equation were tested for exclusion on the basis of a likelihood ratio test. The analysis ended when no further variables for inclusion or exclusion were available [27]. Furthermore, LR was used to estimate the coefficients ( $\beta$ ) of these variables, from which the probability of dyslipidemia was estimated.

**Table 1.** Comparison of baseline characteristics between the training and validation groups.

| Variable                                     | Participants (N= 8,914)                 |                                           | P value |
|----------------------------------------------|-----------------------------------------|-------------------------------------------|---------|
|                                              | Training group (N <sub>1</sub> = 6,686) | Validation group (N <sub>2</sub> = 2,228) |         |
| Age (years), mean ( $\pm$ sd)                | 53.89 (10.89)                           | 52.56 (11.02)                             | 0.9906  |
| Gender (women), n (%)                        | 3,712 (55.52)                           | 1,276 (57.27)                             | 0.1491  |
| Occupation, n (%)                            |                                         |                                           |         |
| Farmers                                      | 5,238 (78.34)                           | 1,750(78.56)                              | 0.9610  |
| Laborers                                     | 586 (8.76)                              | 191(8.57)                                 |         |
| Employers/managers                           | 862 (12.89)                             | 287(12.88)                                |         |
| Education, n (%)                             |                                         |                                           | 0.2317  |
| No education                                 | 1,177 (17.60)                           | 369 (16.56)                               |         |
| Primary school                               | 2,384 (35.66)                           | 768 (34.47)                               |         |
| Middle school                                | 2,484 (37.15)                           | 887 (39.81)                               |         |
| High school                                  | 579 (8.66)                              | 181 (8.12)                                |         |
| College and above                            | 62 (0.93)                               | 23 (1.03)                                 |         |
| Marital status, n (%)                        |                                         |                                           |         |
| Unmarried                                    | 34 (0.51)                               | 9 (0.40)                                  | 0.8261  |
| Married/cohabitation                         | 6,126 (91.62)                           | 2,043 (91.70)                             |         |
| Divorced/widowed                             | 526 (7.87)                              | 176 (7.90)                                |         |
| Physical activity, n (%)                     |                                         |                                           |         |
| Low                                          | 1,913(28.61)                            | 619(27.78)                                | 0.4386  |
| Moderate                                     | 1,579(23.62)                            | 555(24.91)                                |         |
| High                                         | 3,194(47.77)                            | 1,054(47.31)                              |         |
| Individual income (annual), mean ( $\pm$ sd) | 2,075(1199)                             | 2,037(1226)                               | 0.1009  |
| Waist circumference (cm), mean ( $\pm$ sd)   | 82.61(10.36)                            | 82.46(10.15)                              | 0.5222  |
| TC (mmol/L), mean ( $\pm$ sd)                | 4.56 (0.96)                             | 4.58 (0.95)                               | 0.9492  |
| TG (mmol/L), mean ( $\pm$ sd)                | 1.90 (0.53)                             | 1.87 (0.65)                               | 0.1052  |
| H-DLC (mmol/L), mean ( $\pm$ sd)             | 1.11 (0.25)                             | 1.17 (0.27)                               | 0.1464  |
| L-DLC (mmol/L), mean ( $\pm$ sd)             | 2.59 (0.79)                             | 2.62 (0.77)                               | 0.4164  |
| Dyslipidemia, n (%)                          | 3,115 (46.59)                           | 1,011(45.38)                              | 0.3200  |

doi:10.1371/journal.pone.0043834.t001

**Artificial neural network.** The ANN is a nonlinear statistical data modeling tool that can be used to model complex relationships between inputs and outputs or to find patterns in data. The processing elements or nodes are arranged in “input,” “hidden,” and “output” layers, each layer containing one or more nodes. The input layer consists of the data thought to be of value in predicting the outputs of the model [28,29]. Each data point is represented by a node in the input layer. The output layer estimates the probability of the outcome as determined by the model. Each layer comprises one or more processing elements all interconnected in a way that each node in the hidden layer is connected to each node in the input and output layers [28,29]. Each connection carries a “weight” or value that determines the relevance of a particular input for the resulting output [28,29]. The ANN makes predictions based on the strength of connections between the neurons in the input, hidden, and output layers [28,29]. The results of the output layer in ANN model represent the probability of a characteristic of interest (dyslipidemia). Figure 1 presents a flow chart describing the basic ANN design. A procedural description of the algorithm used for ANN in this study is available from the author and listed in Text S1. A more detailed description of ANN could be provided by Zou and Dumont [30,31].

## Statistical Analysis

Analysis was performed in three stages. Firstly, a set of indicators contributing to the prediction of dyslipidemia was identified by univariate and multivariate logistic regression analysis based on the training group. Secondly, The ANN and LR models were performed with the probability of having dyslipidemia as the dependent variable and the risk factors as the independent variables. In general, the analysis structure of the neural network included three layers: input layer to accept information, hidden layer to process information, and output layer to calculate responses. In this study, the ANN model used the same input variables as the LR model. Thirdly, predictive performance was assessed by using receiver operating characteristic (ROC) curve analysis.

The LR model and ROC curve analysis were constructed using SAS 9.1 (SAS Institute, USA). The ANN model was performed with MATLAB 7.1 (MathWorks Institute, USA). All reported *P*-values were two-sided, and *P*-values less than 0.05 were considered statistically significant.

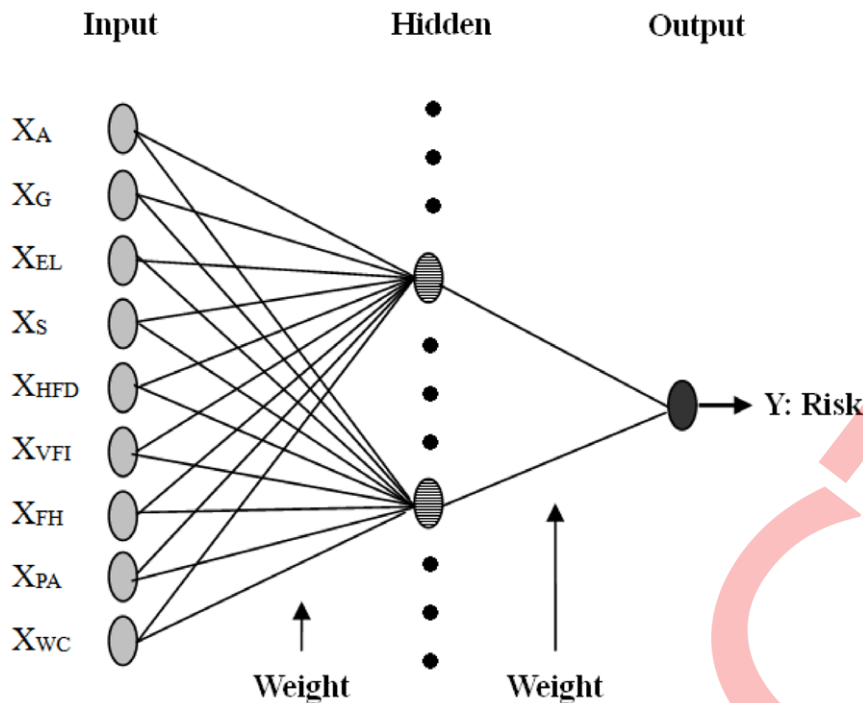

**Figure 1. Framework of artificial neural network model for predicting an individual's risk of dyslipidemia.** The input layer contained 9 neurons. In the hidden layers, the numbers of neuron were 21. The output layer had only one neuron representing the probability of dyslipidemia. **Abbreviations:**  $X_A$ , age;  $X_G$ , gender;  $X_{EL}$ , educational level;  $X_S$ , smoking;  $X_{HFD}$ , high-fat diet;  $X_{VFI}$ , vegetable and fruit intake;  $X_{FH}$ , family history of dyslipidemia;  $X_{PA}$ , physical activity;  $X_{WC}$ , waist circumference. doi:10.1371/journal.pone.0043834.g001

## Results

### Characteristics of the Participants

Table 1 shows the characteristics of the 8,914 subjects in the training and validation groups. The mean age ( $\pm$ sd) was  $53.89 \pm 10.89$  and  $52.56 \pm 11.02$  years in these two groups, respectively, while the number of females were 3,712 (55.52%) and 1,276 (57.27%), respectively. The prevalence rates of dyslipidemia were 46.59% and 45.38% in the training and validation groups, respectively. The relevant variables did not significantly differ between training and validation groups ( $P > 0.05$ ), confirming the reliability of random subject selection.

### Predictors of Dyslipidemia Risk

Table 2 shows the predictors of dyslipidemia risk identified from LR analysis based on the training group ( $N_1 = 6,686$ ). With the construction of a multivariable model (LR analysis, the independent predictors were included when  $P < 0.05$ , and were eliminated when  $P > 0.1$ ). Factors significantly associated with dyslipidemia were age (odds ratio  $OR = 1.042$ ), higher-educational level ( $OR = 1.362$ ), smoking ( $OR = 1.165$ ), more high-fat diet ( $OR = 1.403$ ), positive family history of dyslipidemia ( $OR = 1.876$ ), and central obesity (Male:  $WC \geq 90$  cm; Female:  $WC \geq 80$  cm) ( $OR = 2.327$ ). There was also an inverse relationship for male gender ( $OR = 0.758$ ), more vegetable and fruit intake ( $OR = 0.844$ ), and more physical activity ( $OR = 0.924$ ).

### Prediction Models

The logit probability of having dyslipidemia was described by the following LR model:  $-2.7155 + 0.0410 X_A - 0.2774 X_G + 0.092 X_{EL} + 0.1529 X_S + 0.3385 X_{HFD} - 0.1701 X_{VFI} + 0.6290$

$X_{FH} - 0.0786 X_{PA} + 0.8444 X_{WC}$ . According to the predictors of dyslipidemia risk from the LR analysis, the ANN model was built using the training group data. The predictors used as the model input were  $X_A$ ,  $X_G$ ,  $X_{EL}$ ,  $X_S$ ,  $X_{HFD}$ ,  $X_{VFI}$ ,  $X_{FH}$ ,  $X_{PA}$ , and  $X_{WC}$ . The probability of whether an individual had dyslipidemia was the output variable. The analysis structure of the neural network included three layers: input, hidden and output layers. Figure 1 shows the input layer with 9 neurons, 21 hidden layer neurons and one output layer neuron, corresponding to the forecast variable (that is the probability of having dyslipidemia).

### Comparison of Predictive Performance

The ANN and LR models could successfully distinguish an individual's risk of having dyslipidemia. We compared the individual's predicted risk from the two models with the actual status using the validation group ( $N_2 = 2,228$ ). The ANN model detected 911 dyslipidemia patients from the 1011 actual dyslipidemia patients, whereas the LR model only detected 582 dyslipidemia subjects. Figure 2 summarizes the ROC curve obtained from the LR and ANN models. For the ANN model, the sensitivity, specificity, positive likelihood ratio (+ LR), Negative likelihood ratio (− LR), positive predictive value (PPV), and negative predictive value (NPV) were 90.41%, 76.66%, 3.87, 0.13, 76.33%, and 90.58%, respectively, while the corresponding numbers were only 57.37%, 70.91%, 1.97, 0.60, 62.09%, and 66.73% in the LR model, respectively (Table 3). The AUC value of the ANN model was significantly higher ( $AUC = 0.86 \pm 0.01$ , 95% CI: 0.85–0.88) than that of the LR model ( $AUC = 0.68 \pm 0.01$ , 95% CI: 0.66–0.70) ( $P < 0.001$ ).



**Table 2.** Multivariate logistic regression analysis on risk factors of dyslipidemia in the training group.

| Variable                                   | $\beta$ | S.E.   | Wald     | P-value | OR (95% CI)         |
|--------------------------------------------|---------|--------|----------|---------|---------------------|
| Age, $X_A$                                 | 0.0410  | 0.0029 | 203.5210 | 0.0001  | 1.042 (1.036–1.048) |
| Male, $X_G$                                | −0.2774 | 0.0800 | 12.0404  | 0.0005  | 0.758 (0.648–0.886) |
| Higher-educational level, $X_{EL}$         | 0.3092  | 0.0609 | 25.7535  | 0.0001  | 1.362 (1.209–1.535) |
| Smoking, $X_S$                             | 0.1529  | 0.0454 | 11.3361  | 0.0008  | 1.165 (1.066–1.274) |
| More high-fat diet, $X_{HFD}$              | 0.3385  | 0.1063 | 10.1416  | 0.0014  | 1.403 (1.139–1.728) |
| More vegetable and fruit intake, $X_{VFI}$ | −0.1701 | 0.0548 | 9.6278   | 0.0019  | 0.844 (0.758–0.939) |
| Positive family history, $X_{FH}$          | 0.6290  | 0.0671 | 87.8728  | 0.0001  | 1.876 (1.645–2.139) |
| More physical activity, $X_{PA}$           | −0.0786 | 0.0321 | 5.9851   | 0.0144  | 0.924 (0.868–0.984) |
| Central obesity, $X_{WC}$                  | 0.8444  | 0.0561 | 226.3747 | 0.0001  | 2.327 (2.084–2.597) |

**Abbreviations:**  $X_A$ , age;  $X_G$ , gender;  $X_{EL}$ , educational level;  $X_S$ , smoking;  $X_{HFD}$ , high-fat diet;  $X_{VFI}$ , vegetable and fruit intake;  $X_{FH}$ , family history of dyslipidemia;  $X_{PA}$ , physical activity;  $X_{WC}$ , waist circumference.  
doi:10.1371/journal.pone.0043834.t002

## Discussion

To our knowledge, this is the first study to develop and evaluate the reliability and effectiveness of the ANN model for predicting dyslipidemia risk of rural adults in comparison with the LR model. Our findings showed that the ANN model had superior predictive performance, and the sensitivity, specificity, PPV, NPV, and AUC value of the ANN model were significantly higher than that of the traditional LR model. The ANN model can be used to identify undiagnosed dyslipidemia patients in rural adult population.

Because of the rapidly increasing prevalence of dyslipidemia, detecting people with undiagnosed dyslipidemia is very important in both public health and clinical practice [32,33]. Lipid profile measurement is a standard method for identifying and diagnosing dyslipidemia [34,35], but it is not available in resource limited

settings, especially in some rural areas of developing countries. For example, the costs of TC, TG, HDL-C, and LDL-C measurement are more than ¥30 in China, which is probably the income of three days to a Chinese peasant. Therefore, an effective and inexpensive identifying approach has been sought which could be used to screen undiagnosed dyslipidemia in resource limited countries and areas. In this study, we used a general epidemiology survey database without biochemical parameters to develop and evaluate a prediction model to distinguish patients with dyslipidemia, which is not only inexpensive, but also quick and noninvasive.

Model sensitivity and specificity are important when testing whether a model can accurately recognize positive and negative outcomes [9]. The ideal model has both high sensitivity and high specificity [36]. In this study, the results of the predictive performance showed that the ANN model could be used to accurately screen undiagnosed dyslipidemia patients because it had sufficient sensitivity (90.41%) and specificity (76.66%) compared to the standard LR model (57.37% and 70.91%) for identifying true positive or negative patients. Since AUC provides a superior performance index in addition to superior accuracy, it

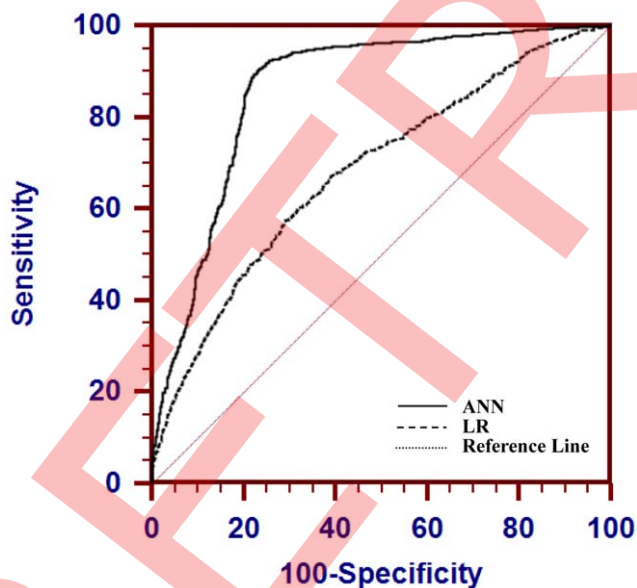

**Figure 2.** ROC curves of ANN and LR prediction models in the validation group. Areas under ROC curves were 0.86 and 0.68 for ANN and LR models, respectively. Area under ROC curve obtained by ANN was superior to that obtained by LR. **Abbreviation:** ANN, artificial neural network; LR, logistic regression; ROC, receiver operating characteristic.

doi:10.1371/journal.pone.0043834.g002

**Table 3.** Performance comparison of ANN and LR models for predicting dyslipidemia in the validation group.

| Variable                | ANN model           | LR model            |
|-------------------------|---------------------|---------------------|
| Sensitivity (%; 95% CI) | 90.41 (88.40–92.22) | 57.37 (54.31–60.38) |
| Specificity (%; 95% CI) | 76.66 (74.18–79.03) | 70.91 (68.29–73.50) |
| + LR (95% CI)           | 3.87 (3.42–4.40)    | 1.97 (1.71–2.28)    |
| − LR (95% CI)           | 0.13 (0.10–0.16)    | 0.60 (0.54–0.67)    |
| PPV (%; 95% CI)         | 76.33 (74.47–78.93) | 62.09 (59.33–66.00) |
| NPV (%; 95% CI)         | 90.58 (86.24–94.26) | 66.73 (61.70–70.53) |
| AUC (95% CI)            | 0.86 (0.85–0.88)    | 0.682 (0.66–0.70)   |

**Abbreviation:** ANN, artificial neural network; LR, logistic regression; CI, confidence intervals; AUC, areas under ROC curve; + LR, positive likelihood ratio; − LR, Negative likelihood ratio; PPV, positive predictive value; NPV, negative predictive value.

doi:10.1371/journal.pone.0043834.t003

was often used to evaluate the predictive accuracy of classifiers [37]. The AUC of a classifier can be defined as the probability of the classifier ranking a randomly chosen positive example higher than a randomly chosen negative example, and higher AUC values can be interpreted as higher predictive accuracy [37,38]. For ANN model, the AUC value ( $AUC = 0.86 \pm 0.01$ ) was superior to that of the LR model ( $AUC = 0.68 \pm 0.01$ ) in terms of predictive accuracy. The above comparisons confirm that the sensitivity, specificity, and AUC for the prediction model constructed using ANN were significantly higher than that of the traditional LR model. That is, the ANN model outperforms the traditional LR model for predicting individual's risk of dyslipidemia in rural adult residents.

The availability of the predictors is also very important when evaluating whether a model is feasible to identify positive and negative outcomes. This study examined the feasibility of the predictors of dyslipidemia in rural adult population. The findings based on the training dataset revealed nine common parameters significantly associated with dyslipidemia, including age, gender, educational level, smoking, high-fat diet, vegetable and fruit intake, family history, physical activity, and central obesity. These predictors without biochemical parameters were readily accessible in the rural population through routinely collected data in general practice or from general survey. In addition, the ANN predictive model can be easily navigated using a simple questionnaire through computerized medical decision support systems, in which the path depends on simple yes or no questions. The final result will help rural healthcare practitioners to quickly determine the individual's risk of dyslipidemia. The ANN predictive model using demographic, lifestyle and anthropometric data provides a feasible approach to screen undiagnosed dyslipidemia patients in rural adult population.

Although this is the first study to develop and evaluate the feasibility of the ANN model for predicting individual's risk of dyslipidemia in rural adult residents, study limitations should be noted. Firstly, evaluations of the different models were based on a cross-sectional survey without a longer follow-up period. Secondly, the samples were limited geographically and ethnically, consisting of a rural community of individuals aged 35–78 years old. Thirdly, the relevant variables were measured, such as smoking, physical

activity, waist circumference, fat, vegetable and fruit consumption, on only a single occasion. Finally, the prediction model was based on a sample without use of data from multiple regions. Despite these limitations, the results are based on a large population-based study combining multiple risk factors, and the prediction approach was reliable and effective to screen undiagnosed dyslipidemia patients in rural adult residents.

## Conclusion

Our findings demonstrate that the ANN model had superior predictive performance compared with the traditional LR model to quickly identify those at high risk of dyslipidemia, and it can be used to screen undiagnosed dyslipidemia patients in rural adult population using general survey data or routinely collected data in general practice. This will help rural healthcare practitioners to evaluate the risks of their patients quickly, inexpensively, and noninvasively. Meanwhile, further work is planned to assess the utility of incorporating multiple rural locations and longer follow-up data.

## Supporting Information

**Text S1** This file contains the procedure of the artificial neural network model in the Matlab environment. (DOCX)

## Acknowledgments

The authors thank all of the participants, coordinators, and administrators for their support and help during the research. The authors also wish to thank MSc. Shuihong Zhou for her help in constructing the ANN model. In addition, the authors would like to thank Mr. Mark Dickson (Doctoral Candidate) and Dr. Luo ZC for their critical reading of the manuscript.

## Author Contributions

Conceived and designed the experiments: RHB CJW. Performed the experiments: YQL LW LLL. Analyzed the data: LLL YRG. Contributed reagents/materials/analysis tools: YQL YRG LYZ MXZ. Wrote the paper: CJW LW.

## References

- Barter P, Gotto AM, LaRosa JC, Maroni J, Szarek M, et al. (2007) HDL cholesterol, very low levels of LDL cholesterol, and cardiovascular events. *N Engl J Med* 357: 1301–1310.
- Robbins CL, Dietz PM, Bombard J, Tregear M, Schmidt SM, et al. (2011) Lifestyle interventions for hypertension and dyslipidemia among women of reproductive age. *Prev Chronic Dis* 8: A123.
- World Health Organization (2002) Quantifying selected major risks to health. In: *The World Health Report 2002-Reducing Risks, Promoting Healthy Life*. Chapter 4: Geneva: 47–97.
- Smith DG (2007) Epidemiology of dyslipidemia and economic burden on the healthcare system. *Am J Manag Care* 13: S68–71.
- Barton P, Andronis L, Briggs A, McPherson K, Capewell S (2011) Effectiveness and cost effectiveness of cardiovascular disease prevention in whole populations: modeling study. *BMJ* 343: d4044.
- Crouch R, Wilson A, Newbury J (2011) A systematic review of the effectiveness of primary health education or intervention programs in improving rural women's knowledge of heart disease risk factors and changing lifestyle behaviours. *Int J Evid Based Healthc* 9: 236–245.
- Freitas MP, Loyola Filho AI, Lima-Costa MF (2011) Dyslipidemia and the risk of incident hypertension in a population of community-dwelling Brazilian elderly: the Bambui Cohort Study of Aging. *Cad Saude Publica* 27: S351–359.
- Halperin RO, Sesso HD, Ma J, Buring JE, Stampfer MJ, Gaziano JM. Dyslipidemia and the risk of incident hypertension in men. *Hypertension*. 2006; 47: 45–50.
- Ho WH, Lee KT, Chen HY, Ho TW, Chiu HC (2012) Disease-free survival after hepatic resection in hepatocellular carcinoma patients: a prediction approach using artificial neural network. *PLoS One* 7: e29179.
- Lin CS, Chang CC, Chiu JS, Lee YW, Lin JA, et al. (2011) Application of an artificial neural network to predict postinduction hypotension during general anesthesia. *Med Decis Making* 31: 308–314.
- Li YC, Chiu WT, Jian WS (2000) Neural networks modeling for surgical decisions on traumatic brain injury patients. *Int J Med Inform* 57: 389–405.
- Park J, Edington DW (2001) A sequential neural network model for diabetes prediction. *Artif Intell Med* 23: 277–293.
- Ergün UU, Serhatlioglu S, Hardalaç F, Güler I (2004) Classification of carotid artery stenosis of patients with diabetes by neural network and logistic regression. *Comput Biol Med* 34: 389–405.
- Sato F, Shimada Y, Selaru FM, Shibata D, Maeda M, et al. (2005) Prediction of survival in patients with esophageal carcinoma using artificial neural networks. *Cancer* 103: 1596–1605.
- Dumont TM, Rughani AI, Tranmer BI (2011) Prediction of symptomatic cerebral vasospasm after aneurysmal subarachnoid hemorrhage with an artificial neural network: feasibility and comparison with logistic regression models. *World Neurosurg* 75: 57–63.
- Santos-García G, Varela G, Novoa N, Jimenez MF (2004) Prediction of postoperative morbidity after lung resection using an artificial neural network ensemble. *Artif Intell Med* 30: 61–69.
- Xin Z, Yuan J, Hua L, Ma YH, Zhao L, et al. (2010) A simple tool detected diabetes and prediabetes in rural Chinese. *J Clin Epidemiol* 63: 1030–1035.
- Schwarz PE, Li J, Lindstrom J, Tuomilehto J (2009) Tools for predicting the risk of type 2 diabetes in daily practice [J]. *Horm Metab Res* 41: 86–97.
- Kazemnejad A, Batvandi Z, Faradmal J (2010) Comparison of artificial neural network and binary logistic regression for determination of impaired glucose tolerance/diabetes [J]. *East Mediterr Health J* 16: 615–620.

20. Forberg JL, Green M, Björk J, Ohlsson M, Edenbrandt L, et al. (2009) In search of the best method to predict acute coronary syndrome using only the electrocardiogram from the emergency department. *J Electrocardiol* 42: 58–63.
21. Lin CC, Bai YM, Chen JY, Hwang TJ, Chen TT, et al. (2010) Easy and low-cost identification of metabolic syndrome in patients treated with second-generation antipsychotics: artificial neural network and logistic regression models. *J Clin Psychiatry* 71: 225–234.
22. China National Center for Food Safety Risk Assessment; Yang YX, Wang GY, Pan XC (2009) *China Food Composition Table* (2nd edition). Beijing, China: Peking University Medical Press, 2009.
23. Chinese Nutrition Society. *Chinese Dietary Guidelines* (2007). Tibet, China: Tibet People's Publishing House, 2008.
24. International Physical Activity Questionnaire (2012) Short Last 7 Days Self-Administered Format 2005. Available at: <http://www.ipaq.ki.se>, Accessed 28 March 2012.
25. World Health Organization (2000) International Association for the Study of Obesity: The Asia-Pacific Perspective: Redefining Obesity and its Treatment. Health Communications Australia: Melbourne, 2000.
26. China Adult Dyslipidemia Prevention Committee (2007) *China Adult Dyslipidemia Prevention Guide*. Beijing, China: People's Health Publishing House, 2007.
27. Lin CS, Chang CC, Chiu JS, Lee YW, Lin JA, et al. (2011) Application of an artificial neural network to predict post-induction hypotension during general anesthesia. *Med Decis Making*. 31: 308–314.
28. Grossi E, Buscema M (2007) Introduction to artificial neural networks. *Eur J Gastroenterol Hepatol* 19: 1046–1054.
29. Patel JL, Goyal RK (2007) Applications of artificial neural networks in medical science. *Curr Clin Pharmacol* 2: 217–226.
30. Zou J, Han Y, So SS (2008) Overview of artificial neural networks. *Methods Mol Biol* 458: 15–23.
31. Dumont TM, Rughani AI, Tranmer BI (2011) Prediction of Symptomatic Cerebral Vasospasm after Aneurysmal Subarachnoid Hemorrhage with an Artificial Neural Network: Feasibility and Comparison with Logistic Regression Models. *World Neurosurg* 75: 57–63; discussion 25–28.
32. Petrella RJ, Merikle E, Jones J (2007) Prevalence and treatment of dyslipidemia in Canadian primary care: a retrospective cohort analysis. *Clin Ther* 29: 742–750.
33. Snow V, Aronson MD, Hornbake ER, Mottur-Pilson C, Weiss KB, et al. (2004) Lipid control in the management of type 2 diabetes mellitus: a clinical practice guideline from the American College of Physicians. *Ann Intern Med* 140: 644–649.
34. Iwasaki Y, Matsuyama H, Nakashima N (2006) Improved specificity of a new homogeneous assay for LDL-cholesterol in serum with abnormal lipoproteins. *Clin Chem* 52: 886–888.
35. Yamada K, Tsuji N, Fujita T, Tanaka M, Kuribayashi K, et al. (2010) Comparison of four direct homogeneous methods for the measurement of low-density lipoprotein cholesterol. *Clin Lab* 56: 327–333.
36. Walker HK, Hall WD, Hurst JW (1990) *Clinical Methods: The History, Physical, and Laboratory Examinations* (3<sup>rd</sup> edition). Boston, USA: Butterworth Publishers, 1990.
37. Fawcett T (2006) An introduction to ROC analysis. *Pattern Recogn Lett* 27: 861–874.
38. Ke WS, Hwang Y, Lin E (2010) Pharmacogenomics of drug efficacy in the interferon treatment of chronic hepatitis C using classification algorithms. *Adv Appl Bioinform Chem* 3: 39–44.
